# Supplementary material for: Differences in persistence between dogs and wolves in an unsolvable task in the absence of humans
Source: PeerJ. 2018 Nov 27;6:e5944. doi: 10.7717/peerj.5944 (PMC6266929; doi:10.7717/peerj.5944)
Supplement: Supplemental Information 1 [file peerj-06-5944-s001.xlsx]

## Sheet: Combined Dataset
Individual	Species	Object	Manipulated	Contact.Latency	Approach.Posture	Persistence	Motor.Diversity	Nose	Bite	One.Paw	One.Paw.Bite	One.Paw.Nose	Paws.On	Scratch	Scratch.Bite	Hold.Bite	Dig	Lick
Asali	Dog	Ball	Yes	0.8	Confident	17.2	2	15	0	2	0	0	0	0	0	0	0	3
Banzai	Dog	Ball	No	1.4	Insecure	0	0	0	0	0	0	0	0	0	0	0	0	0
Binti	Dog	Ball	Yes	0.8	Confident	3.4	2	1	0	2	0	0	0	0	0	0	0	3
Bora	Dog	Ball	Yes	1.2	Insecure	2.4	1	3	0	0	0	0	0	0	0	0	0	0
Enzi	Dog	Ball	Yes	1	Insecure	12.6	3	1	0	5	0	2	0	0	0	0	0	0
Gombo	Dog	Ball	No	NA	Confident	0	0	0	0	0	0	0	0	0	0	0	0	0
Hiari	Dog	Ball	Yes	0.6	Confident	160	4	37	13	0	3	11	0	0	0	0	0	17
Imara	Dog	Ball	No	2	Confident	0	0	0	0	0	0	0	0	0	0	0	0	0
Layla	Dog	Ball	Yes	1	Confident	2.8	1	5	0	0	0	0	0	0	0	0	0	2
Maisha	Dog	Ball	Yes	0.8	Confident	4	3	5	0	2	0	1	0	0	0	0	0	0
Meru	Dog	Ball	Yes	0.6	Confident	349.8	5	38	31	52	26	42	2	0	3	2	0	6
Nia	Dog	Ball	Yes	0.8	Confident	11	3	3	0	3	0	4	0	0	0	0	0	0
Nuru	Dog	Ball	Yes	0.6	Confident	16.2	3	4	0	1	0	3	0	0	0	0	0	1
Panya	Dog	Ball	Yes	1.2	Confident	0.8	1	1	0	0	0	0	0	0	0	0	0	1
Pepeo	Dog	Ball	Yes	0.8	Confident	5.8	3	2	0	2	0	4	0	0	0	0	0	1
Sahibu	Dog	Ball	Yes	1.2	Confident	3.8	1	4	0	0	0	0	0	0	0	0	0	0
Zuri	Dog	Ball	Yes	1	Confident	4.6	1	2	0	0	0	0	0	0	0	0	0	0
Amarok	Wolf	Ball	Yes	0.8	Confident	1032.6	8	76	120	3	20	24	1	0	15	2	0	23
Aragorn	Wolf	Ball	Yes	0.4	Insecure	484	10	33	63	74	9	31	2	7	6	2	12	53
Chitto	Wolf	Ball	Yes	1.4	Confident	572.2	6	23	29	10	59	48	0	0	6	0	0	16
Geronimo	Wolf	Ball	Yes	0.8	Confident	63	6	10	10	5	8	6	0	0	1	0	0	1
Kaspar	Wolf	Ball	Yes	1.2	Confident	783.4	7	40	83	8	47	20	0	0	8	16	0	18
Kenai	Wolf	Ball	Yes	1.2	Insecure	14.6	4	5	4	5	0	0	0	0	0	0	4	0
Nanuk	Wolf	Ball	Yes	1.6	Confident	143.6	7	24	22	8	14	8	0	0	12	3	0	2
Shima	Wolf	Ball	Yes	0.6	Confident	470	7	18	48	3	14	10	0	0	9	1	0	27
Tala	Wolf	Ball	Yes	1.8	Confident	194	6	18	31	4	13	22	0	0	9	0	0	20
Una	Wolf	Ball	Yes	28.2	Insecure	5.6	1	0	0	1	0	0	0	0	0	0	0	0
Wamblee	Wolf	Ball	Yes	1	Confident	164.6	6	39	40	27	1	7	0	0	0	0	2	10
Yukon	Wolf	Ball	Yes	2	Confident	94.8	7	11	11	2	8	5	0	0	4	3	0	2
Asali	Dog	Pipe	No	0.8	Confident	0	0	0	0	0	0	0	0	0	0	0	0	0
Banzai	Dog	Pipe	No	1	Insecure	0	0	0	0	0	0	0	0	0	0	0	0	0
Binti	Dog	Pipe	Yes	0.6	Confident	190.4	5	28	5	5	0	5	0	0	0	0	1	24
Bora	Dog	Pipe	No	1.6	Confident	0	0	0	0	0	0	0	0	0	0	0	0	0
Enzi	Dog	Pipe	No	1.4	Confident	0	0	0	0	0	0	0	0	0	0	0	0	0
Hiari	Dog	Pipe	Yes	0.8	Confident	694	8	59	148	6	53	75	0	1	18	1	0	71
Imara	Dog	Pipe	Yes	2.4	Confident	2.6	3	2	0	1	0	1	0	0	0	0	0	0
Layla	Dog	Pipe	Yes	1	Confident	1.6	0	0	0	0	0	0	0	0	0	0	0	2
Maisha	Dog	Pipe	Yes	0.6	Confident	17.6	5	7	1	3	1	6	0	0	0	0	0	1
Meru	Dog	Pipe	Yes	0.8	Confident	1314.2	9	131	256	40	48	93	3	4	22	3	0	159
Nia	Dog	Pipe	Yes	1.2	Confident	6.8	4	2	1	3	0	2	0	0	0	0	0	1
Nuru	Dog	Pipe	Yes	0.8	Confident	1609.2	9	238	270	48	68	135	0	1	14	2	4	93
Panya	Dog	Pipe	Yes	1	Confident	5.4	3	2	0	1	0	1	0	0	0	0	0	3
Pepeo	Dog	Pipe	Yes	0.8	Confident	11.8	2	2	0	2	0	0	0	0	0	0	0	0
Sahibu	Dog	Pipe	Yes	1.8	Confident	2.6	2	0	0	2	0	0	0	0	0	0	1	0
Zuri	Dog	Pipe	No	1.2	Confident	0	0	0	0	0	0	0	0	0	0	0	0	0
Amarok	Wolf	Pipe	Yes	0.2	Confident	1025	7	53	209	6	42	51	0	0	21	10	0	58
Aragorn	Wolf	Pipe	Yes	0.6	Confident	97.4	4	6	19	0	0	6	0	1	0	0	0	16
Chitto	Wolf	Pipe	Yes	0.8	Confident	453.4	6	73	68	5	22	38	0	0	4	0	0	45
Geronimo	Wolf	Pipe	Yes	1	Confident	62.4	6	16	14	3	3	12	0	0	2	0	0	3
Kaspar	Wolf	Pipe	Yes	1	Confident	1045.6	10	42	131	21	33	27	3	3	9	11	1	47
Kenai	Wolf	Pipe	Yes	3.2	Confident	1.2	1	0	1	0	0	0	0	0	0	0	0	1
Nanuk	Wolf	Pipe	Yes	1.6	Confident	0.6	1	1	0	0	0	0	0	0	0	0	0	1
Shima	Wolf	Pipe	Yes	1	Confident	415.2	9	42	78	23	21	34	1	3	7	0	1	14
Tala	Wolf	Pipe	Yes	1	Confident	42.4	6	5	6	4	1	7	0	0	1	0	0	5
Una	Wolf	Pipe	Yes	2.8	Confident	2.8	2	0	0	1	0	0	0	0	0	0	1	0
Wamblee	Wolf	Pipe	Yes	1	Confident	21.8	2	1	23	0	0	0	0	0	0	0	0	2
Yukon	Wolf	Pipe	Yes	1.6	Confident	6.2	3	4	4	0	0	1	0	0	0	0	0	1
